# Supplementary material for: Frequent loss of FAM126A expression in colorectal cancer results in selective FAM126B dependency
Source: PubMed Central journal article supplement (PMC11025007; doi:10.1016/j.isci.2024.109646), 2024-03-29
Supplement: mmc1.pdf [file mmc1.pdf]

iScience, Volume 27

**Supplemental information**

**Frequent loss of *FAM126A* expression  
in colorectal cancer results  
in selective *FAM126B* dependency**

**Shuang Li and Ting Han**



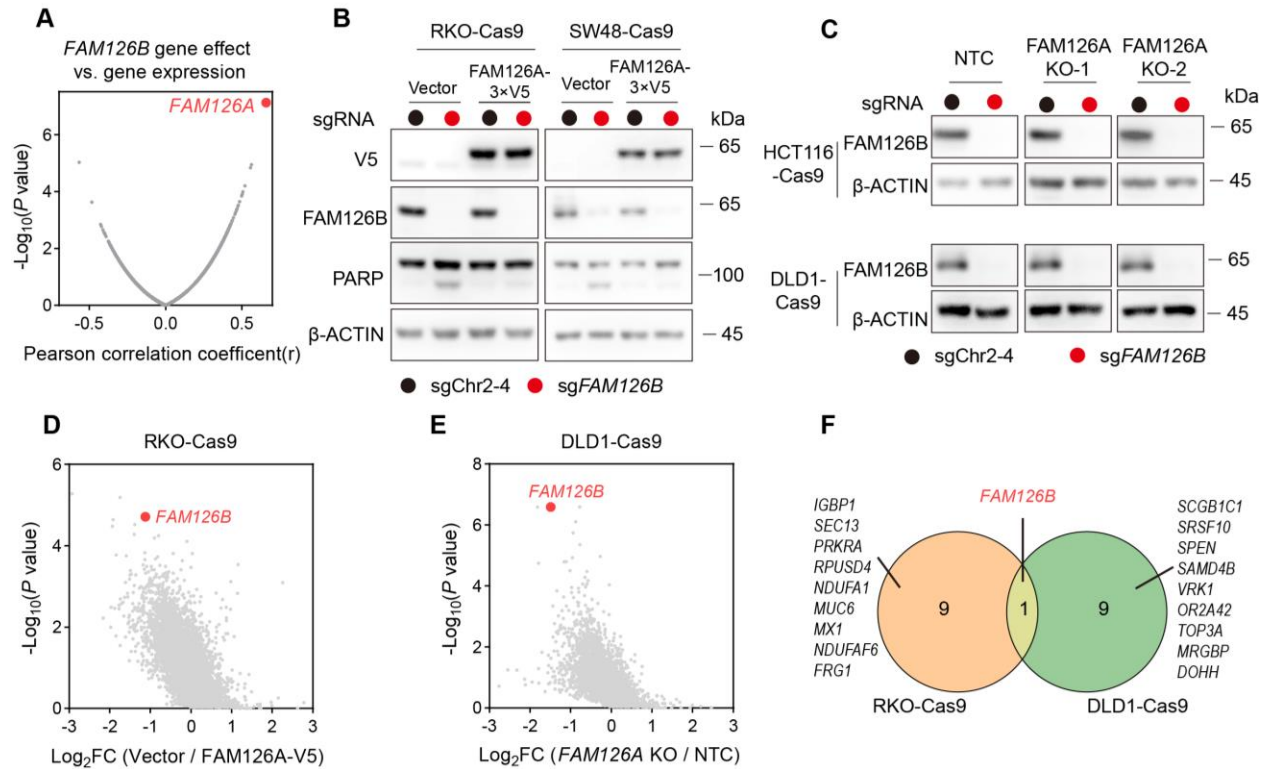

**Figure S2. Perturbation of *FAM126A* expression alters *FAM126B* dependency in CRC cell lines, related to Figure 3.** **A**, Correlation of *FAM126B* gene effect (Chronos) with the expression levels of every human gene among 53 CRC cell lines. **B**, Detection of *FAM126B* depletion and PARP1 cleavage in indicated cell lines following sgRNA transduction by western blotting. **C**, Verification of *FAM126B* depletion in indicated cell lines. **D**, Scatterplot depicting genes with significantly depleted sgRNAs in RKO-Cas9 cells expressing vector versus RKO-Cas9 cells expressing *FAM126A*-3xV5. **E**, Scatterplot depicting genes with significantly depleted sgRNAs in DLD1 *FAM126A* knockout cells relative to DLD1 cells expressing a non-targeting control (NTC) sgRNA. Genes were plotted based on mean  $\log_2$  fold change ( $\log_2$ FC) of sgRNA counts and  $P$  values computed by MAGeCK. **F**, Venn diagram indicating the overlap between top 10 depleted genes (based on  $P$  values) in **D** and **E**.

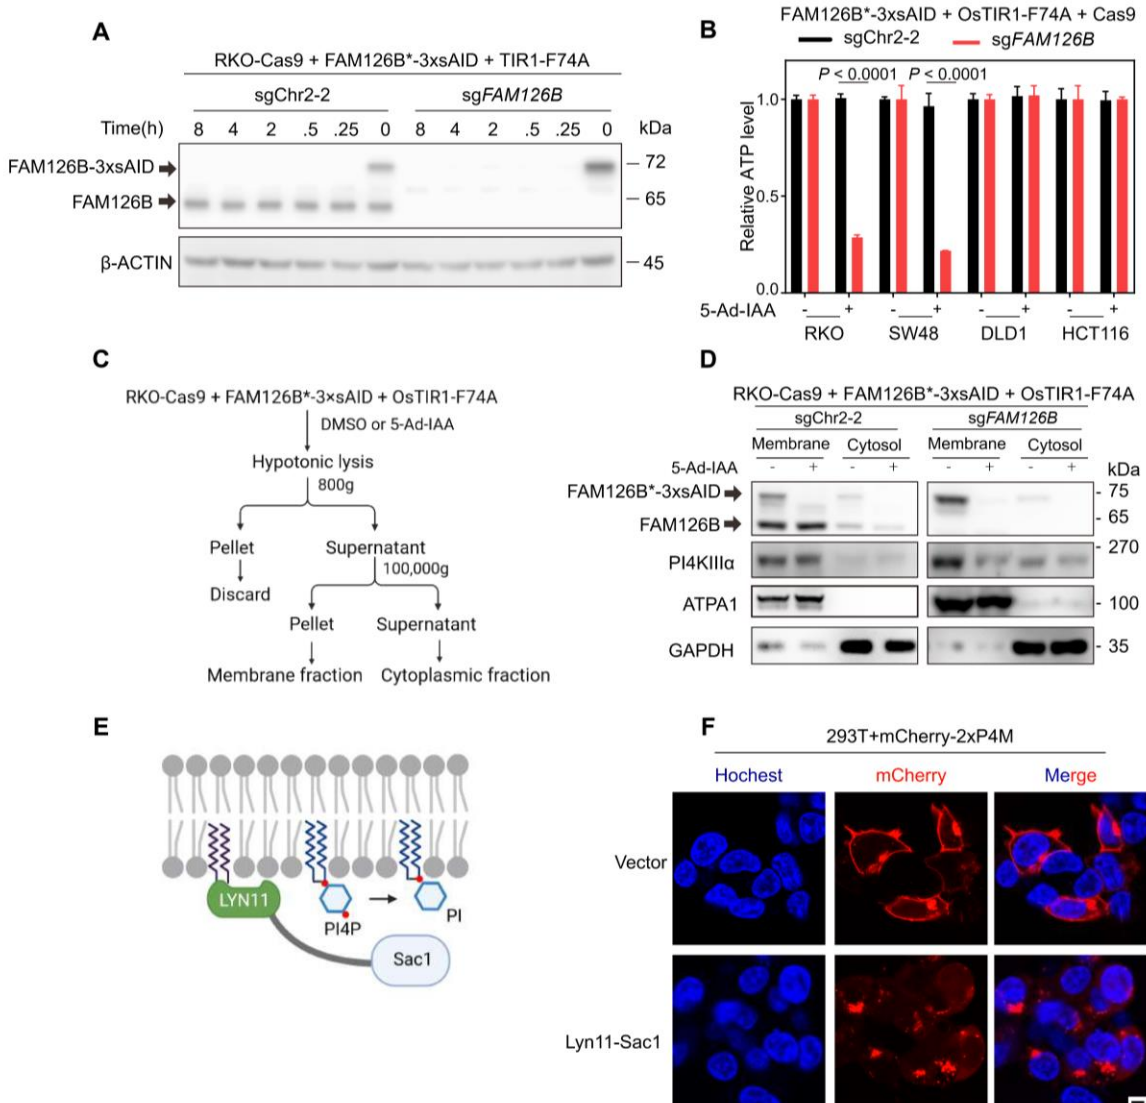

**Figure S3. FAM126B is required for PI4KIII $\alpha$  plasma membrane localization, related to Figure 4. A,** Degradation of FAM126B-3 $\times$ AID induced by 5-Ad-IAA at indicated time points. **B,** Effect of FAM126B-3 $\times$ AID degradation on cell viability. Indicated cell lines were cultured in the presence of DMSO or 250 nM 5-Ad-IAA for about 10 days before measurement of intracellular ATP. Data are the mean  $\pm$  s.d. of three biological replicates and normalized to DMSO. **C,** Flowchart of subcellular fractionation. **D,** Detection of indicated proteins in subcellular fractions as indicated by western blotting. Cells were treated with DMSO or 5-Ad-IAA for 24 hours before subcellular fractionation. ATPA1 (ATPase Na<sup>+</sup>/K<sup>+</sup> transporting subunit alpha 1) was used as a plasma membrane marker. GAPDH (glyceraldehyde-3-phosphate dehydrogenase) was used as a cytosolic marker. **E,** Strategy for depleting PI4P on plasma membrane. **F,** Effect of Lyn11-Sac1 on cellular pools of PI4P. Vector or Lyn11-Sac1 was co-transfected with mCherry-2 $\times$ P4M into 293T cells. Confocal images were taken 24 hours later. Hoechst staining was used to visualize nuclei. Scale bar: 5  $\mu$ m.

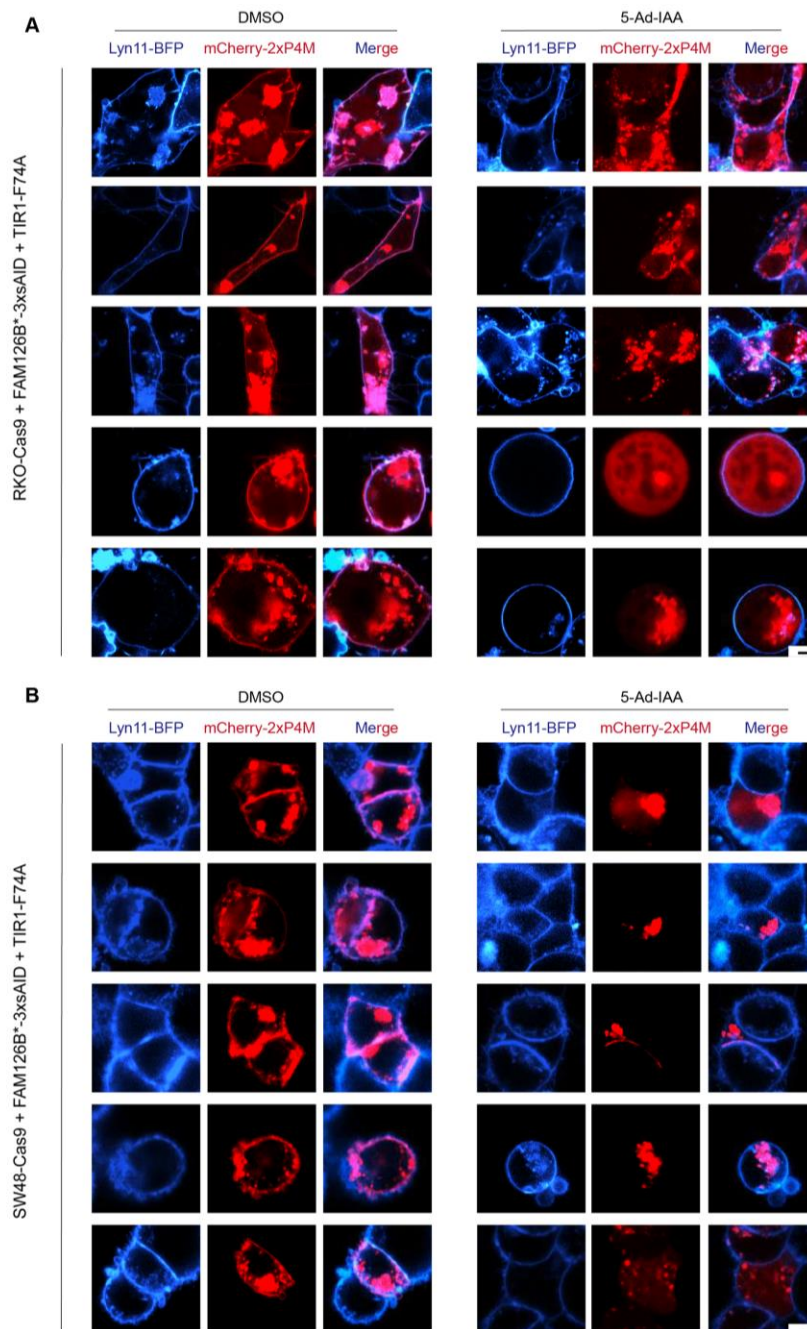

**Figure S4. FAM126B degradation depletes the PM PI4P pool in RKO and SW48 cells, related to Figure 4. A–B**, Detection of cellular PI4P by transiently transfecting mCherry-2xP4M probe into indicated cell lines followed by confocal imaging. Lyn11-BFP is a plasma membrane marker. Scale bar: 2.5  $\mu$ m.

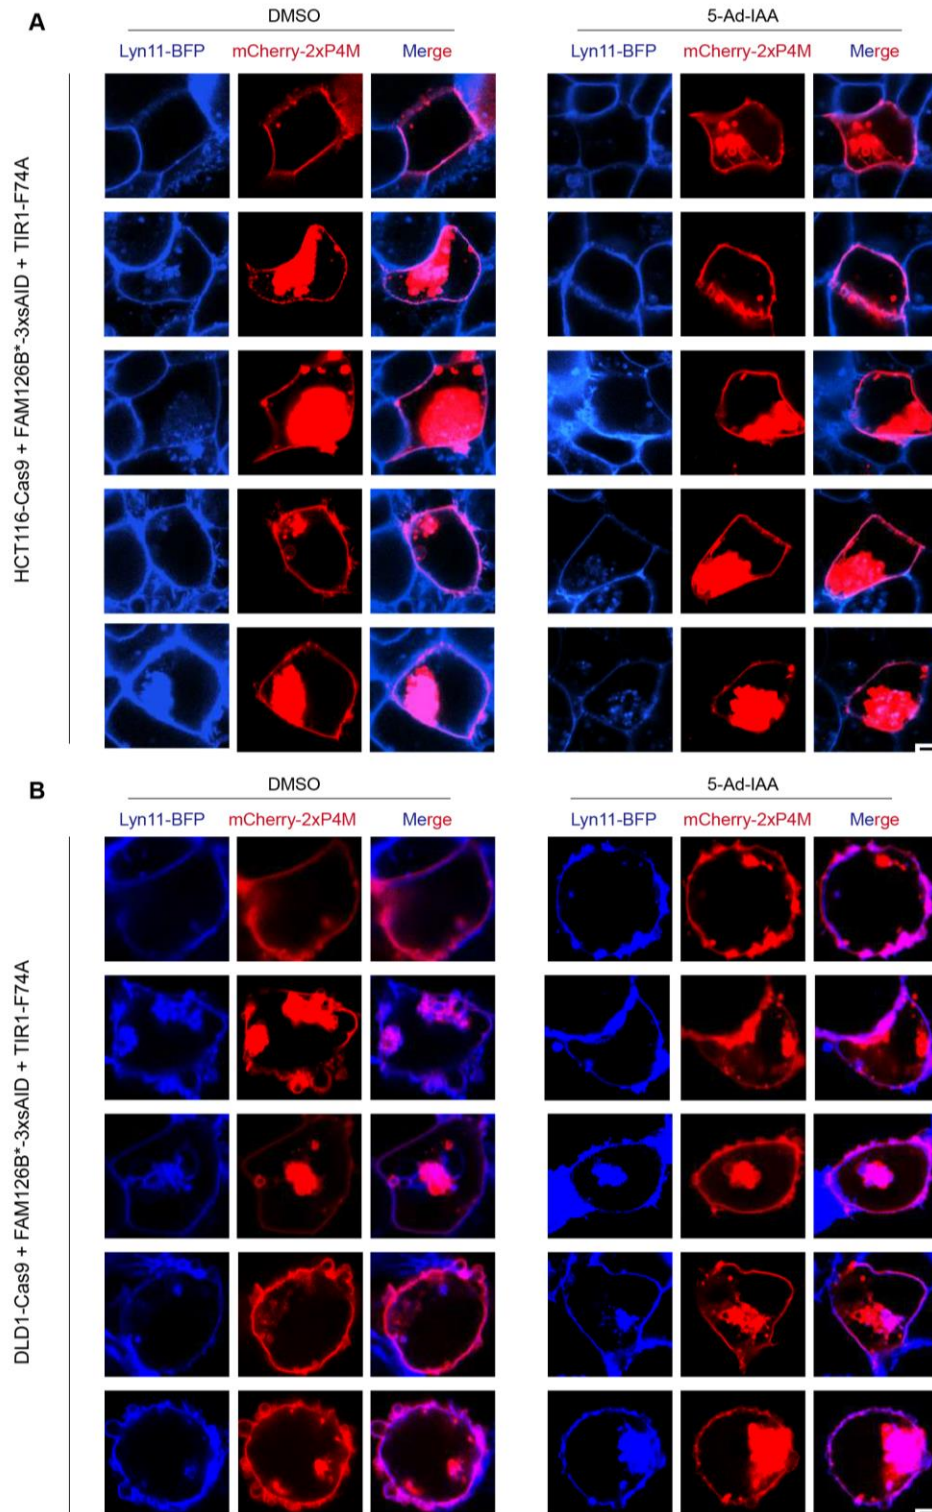

**Figure S5. FAM126B degradation does not affect the PM PI4P pool in DLD1 and HCT116 cells, related to Figure 4. A–B,** Detection of cellular PI4P by transiently transfecting mCherry-2×P4M probe into indicated cell lines followed by confocal imaging. Lyn11-BFP is a plasma membrane marker. Scale bar: 2.5 μm.

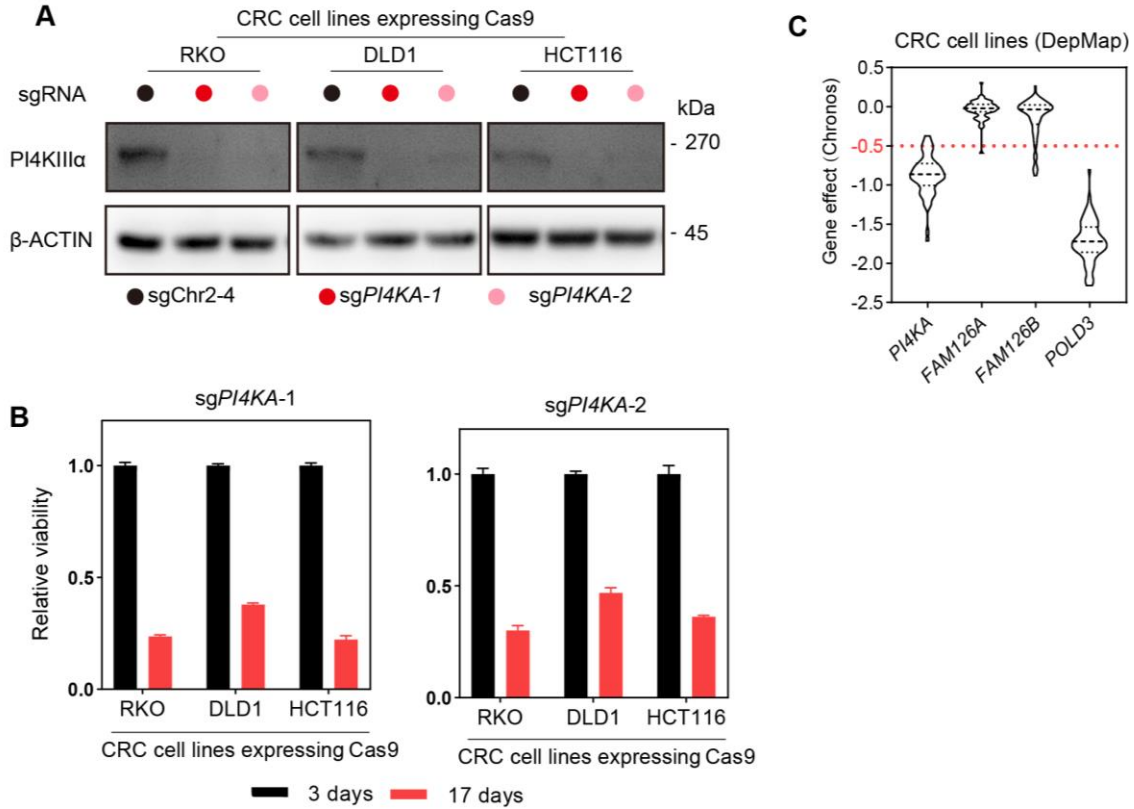

**Figure S6. *PI4KA* is a common essential gene, related to Figure 5. A**, Verification of PI4KIII $\alpha$  depletion with two independent sgRNAs by western blotting. **B**, Competitive cell growth assay after inactivation of *PI4KA* in indicated cell lines. Data are the mean  $\pm$  s.d. from three technical replicates and normalized to control (sgChr2-4). **C**, Violin plot depicting the distribution of the gene effects of *PI4KA*, *FAM126A*, *FAM126B*, and *POLD3*.

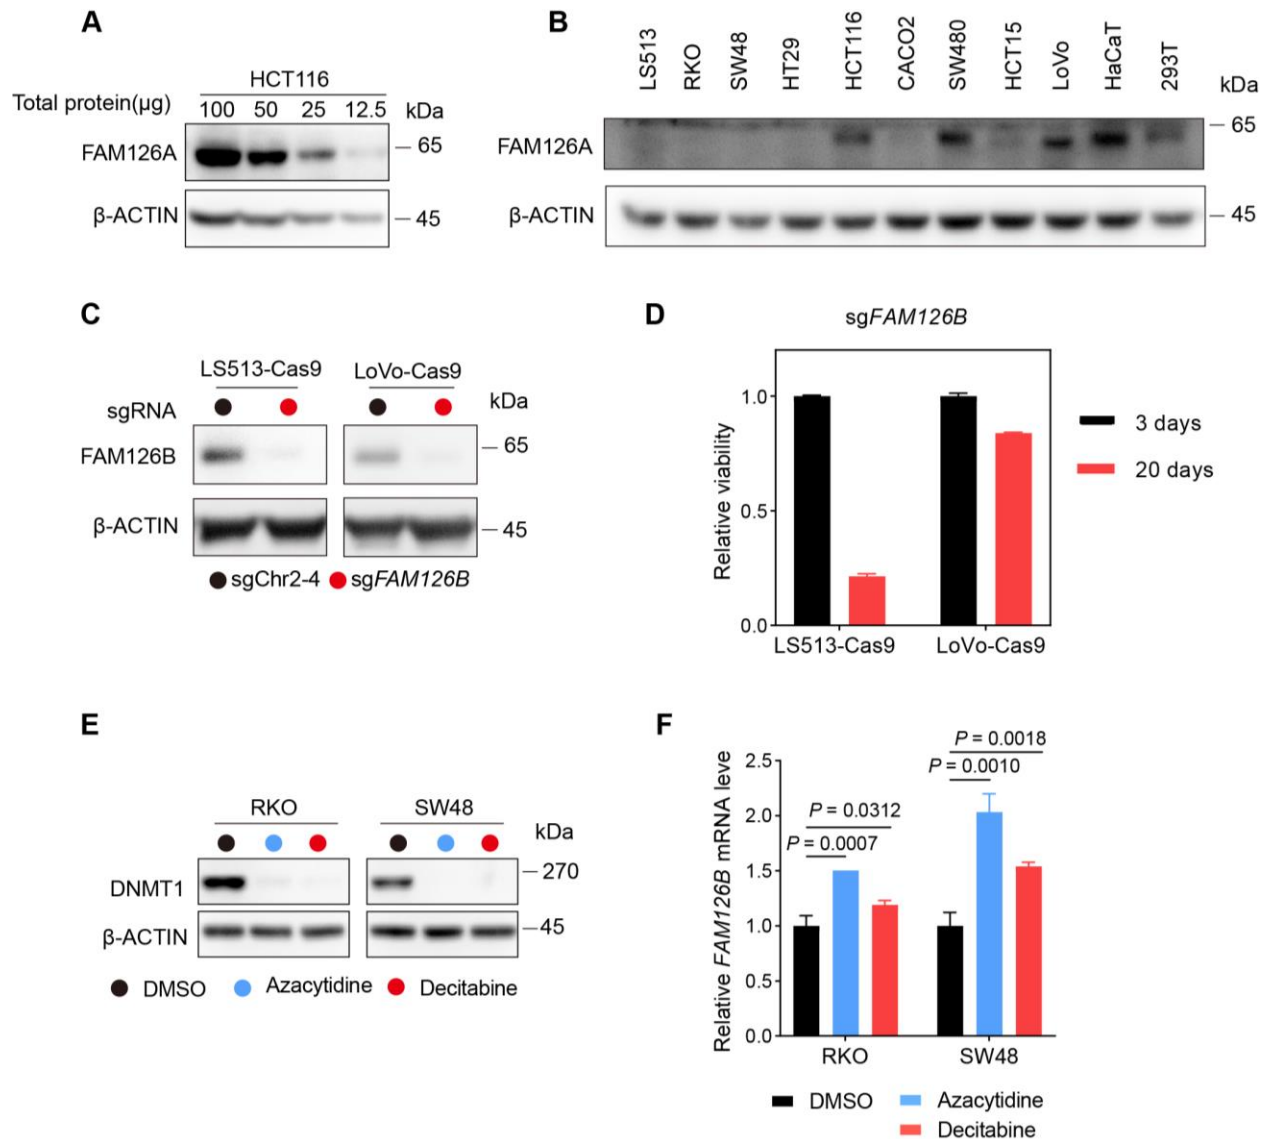

**Figure S7. Epigenetic silencing of *FAM126A* expression is prevalent and can be reversed by inhibition of DNA methylation in CRC cell lines, related to Figure 6.** **A**, Measurement of the linear range of *FAM126A* detection by western blotting. **B**, Detection of *FAM126A* in indicated cell lines by western blotting. **C**, Verification of *FAM126B* depletion in indicated cell lines. **D**, Competitive cell growth assay after inactivation of *FAM126B* in indicated cell lines. Data are the mean  $\pm$  s.d. from three technical replicates and normalized to control (sgChr2-4). **E**, Detection of DNMT1 following treatment with azacytidine or decitabine of indicated cell lines by western blotting. **F**, Effect of azacytidine and decitabine on *FAM126B* expression. RKO or SW48 cells were treated with 4  $\mu$ M Azacytidine or 20  $\mu$ M decitabine for 72 hours before qPCR analysis of *FAM126A* expression. Student's t-tests (two-tailed, unpaired) were used to determine the statistical significance. Data were the mean  $\pm$  s.d. of three biological replicates.



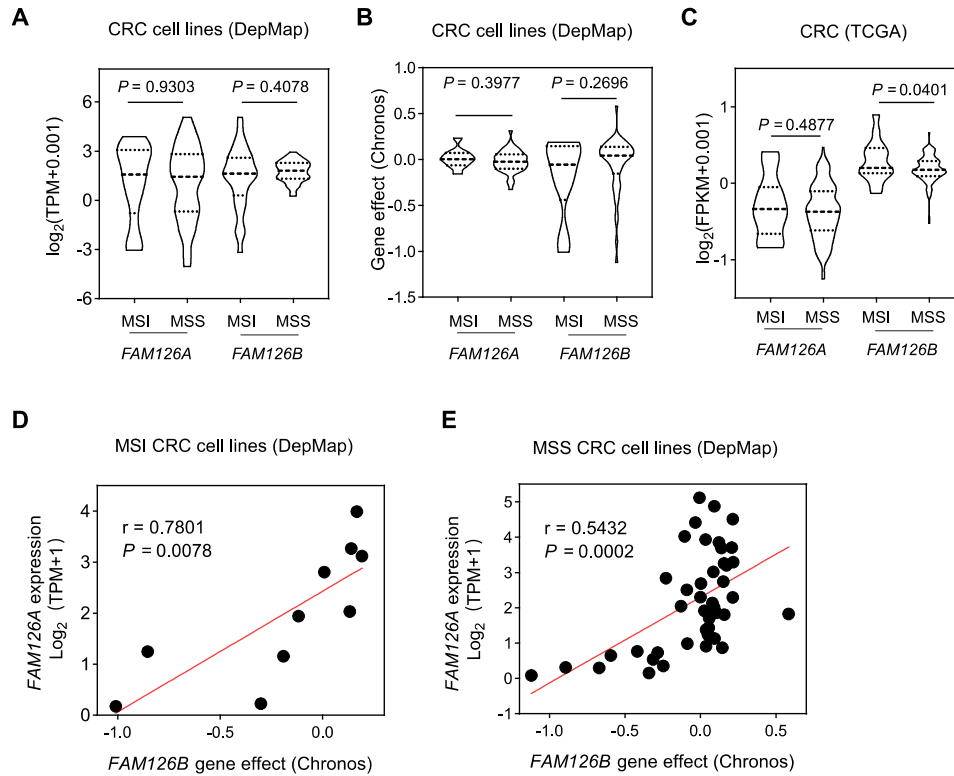

**Figure S8. SL relationship between *FAM126A* and *FAM126B* in MSI and MSS CRC cell lines, related to Figure 6.** **A**, Violin plot depicting the distribution of *FAM126A* and *FAM126B* expression in MSI (n=16) and MSS (n=56) CRC cell lines from DepMap (22Q4). **B**, Violin plot depicting the distribution of *FAM126A* and *FAM126B* dependence in MSI (n=10) and MSS (n=46) CRC cell lines from DepMap (22Q4). **C**, Violin plot depicting distribution of *FAM126A* and *FAM126B* expression in MSI (n=15) and MSS (n=114) CRC tumor samples. Data were obtained from TCGA. **D**, Scatterplot depicting the correlation between *FAM126A* expression and *FAM126B* gene effect in MSI CRC cell lines (n=10). Pearson correlation coefficient (r) and P value were indicated on the plot. Linear regression was represented by the red line. **E**, Scatterplot depicting the correlation between *FAM126A* expression and *FAM126B* gene effect in MSS CRC cell lines (n=43). Pearson correlation coefficients (r) and P values were indicated on the plot. Linear regression was represented by the red line.

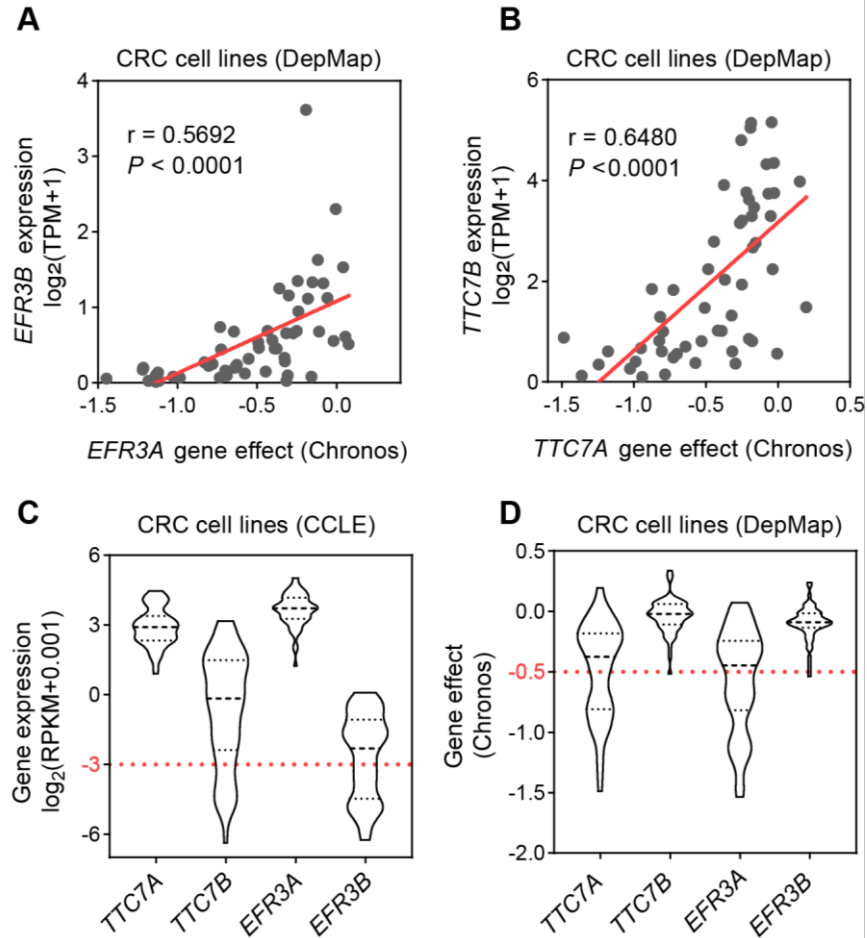

**Figure S9. SL interactions in *EFR3* and *TTC7* gene families, related to Figure 6. A**, Scatterplot depicting the correlation between *EFR3B* expression and *EFR3A* gene effect. **B**, Scatterplot depicting the correlation between *TTC7B* expression and *TTC7A* gene effect. TPM stands for transcripts per million clean reads. Pearson correlation coefficient ( $r$ ) and  $P$  value were indicated on the plot. Linear regression was represented by the red line. **C**, Violin plot depicting the distribution of *EFR3A/B* and *TTC7A/B* expression in 57 CRC cell lines from CCLE. **D**, Violin plot depicting the distribution of *EFR3A/B* and *TTC7A/B* gene effects (Chronos) in 57 CRC cell lines from DepMap (22Q4).
